# Supplementary material for: MAP3K7 is an innate immune regulatory gene with increased expression in human and murine kidney intercalated cells following uropathogenic Escherichia coli exposure
Source: PubMed Central journal article supplement — J Cell Biochem. 2022 Aug 12;123(11):1817–26. doi: 10.1002/jcb.30318 (PMC9671826; doi:10.1002/jcb.30318), 2022-08-12
Supplement: NIHMS1827887-supplement-supinfo3.pdf [file NIHMS1827887-supplement-supinfo3.pdf]

# RT<sup>2</sup> Profiler PCR Array Gene Expression Analysis Report

Vijay Saxena

12-15-2021

---

# Table of Contents

- Introduction 3
- Summary and workflow 4
- Gene Table 5
- Data analysis setup 8
- Data quality control (QC) 9
- Normalization analysis 10
- Result 11
  - Fold regulation and p-value . . . . . 11
  - Scatter Plot . . . . . 12
  - Volcano Plot . . . . . 16
  - Clustergram . . . . . 20
  - Heat Map . . . . . 21

---

# Introduction

## Cataloged arrays

RT<sup>2</sup> Profiler PCR Arrays are highly reliable and sensitive gene expression profiling tools for analyzing focused panels of genes in signal transduction, biological processes or disease research pathways using real-time PCR. Each cataloged RT<sup>2</sup> Profiler PCR Array contains a list of the pathway-focused genes as well as five housekeeping (reference) genes on the array. In addition, each array contains a panel of proprietary controls to monitor genomic DNA contamination (GDC) as well as the first strand synthesis (RTC) and real-time PCR efficiency (PPC). The qPCR Assays used in PCR Arrays are laboratory-verified and optimized to work under standard conditions enabling a large number of genes to be assayed simultaneously. Their specificity is guaranteed when RT<sup>2</sup> SYBR Green qPCR Master Mixes are used as part of the complete PCR Array System protocol.

In this study, 96 genes were profiled on 6 samples with the PAHS-148Z.

---

# Summary and workflow

## Cataloged arrays

1. Mature RNA was isolated using an RNA extraction kit according to the manufacturer's instructions.
2. RNA quality was determined using a spectrophotometer and was reverse transcribed using a cDNA conversion kit.
3. The cDNA was used on the real-time RT<sup>2</sup> Profiler PCR Array (QIAGEN, Cat. no. PAHS-148Z) in combination with RT<sup>2</sup> SYBR® Green qPCR Mastermix (Cat. no. 330529).

C<sub>T</sub> values were exported to an Excel file to create a table of C<sub>T</sub> values. This table was then uploaded on to the data analysis web portal at <http://www.qiagen.com/geneglobe>. Samples were assigned to controls and test groups. C<sub>T</sub> values were normalized based on a/an Manual Selection of reference genes.

The data analysis web portal calculates fold change/regulation using delta delta C<sub>T</sub> method, in which delta C<sub>T</sub> is calculated between gene of interest (GOI) and an average of reference genes (HKG), followed by delta-delta C<sub>T</sub> calculations (delta C<sub>T</sub> (Test Group)-delta C<sub>T</sub> (Control Group)). Fold Change is then calculated using  $2^{-\Delta\Delta C_T}$  formula. The data analysis web portal also plots scatter plot, volcano plot, clustergram, and heat map.

This data analysis report was exported from the QIAGEN web portal at GeneGlobe.

# Gene Table

| Position | RefSeq Number | Symbol   | Description                                                                                               |
|----------|---------------|----------|-----------------------------------------------------------------------------------------------------------|
| A01      | NM_005163     | AKT1     | V-akt murine thymoma viral oncogene homolog 1                                                             |
| A02      | NM_001639     | APCS     | Amyloid P component, serum                                                                                |
| A03      | NM_001165     | BIRC3    | Baculoviral IAP repeat containing 3                                                                       |
| A04      | NM_001725     | BPI      | Bactericidal/permeability-increasing protein                                                              |
| A05      | NM_004345     | CAMP     | Cathelicidin antimicrobial peptide                                                                        |
| A06      | NM_032587     | CARD6    | Caspase recruitment domain family, member 6                                                               |
| A07      | NM_052813     | CARD9    | Caspase recruitment domain family, member 9                                                               |
| A08      | NM_033292     | CASP1    | Caspase 1, apoptosis-related cysteine peptidase (interleukin 1, beta, convertase)                         |
| A09      | NM_001228     | CASP8    | Caspase 8, apoptosis-related cysteine peptidase                                                           |
| A10      | NM_002983     | CCL3     | Chemokine (C-C motif) ligand 3                                                                            |
| A11      | NM_002985     | CCL5     | Chemokine (C-C motif) ligand 5                                                                            |
| A12      | NM_000591     | CD14     | CD14 molecule                                                                                             |
| B01      | NM_001278     | CHUK     | Conserved helix-loop-helix ubiquitous kinase                                                              |
| B02      | NM_000567     | CRP      | C-reactive protein, pentraxin-related                                                                     |
| B03      | NM_001911     | CTSG     | Cathepsin G                                                                                               |
| B04      | NM_001511     | CXCL1    | Chemokine (C-X-C motif) ligand 1 (melanoma growth stimulating activity, alpha)                            |
| B05      | NM_002089     | CXCL2    | Chemokine (C-X-C motif) ligand 2                                                                          |
| B06      | NM_004406     | DMBT1    | Deleted in malignant brain tumors 1                                                                       |
| B07      | NM_003824     | FADD     | Fas (TNFRSF6)-associated via death domain                                                                 |
| B08      | NM_001017963  | HSP90AA1 | Heat shock protein 90kDa alpha (cytosolic), class A member 1                                              |
| B09      | NM_024013     | IFNA1    | Interferon, alpha 1                                                                                       |
| B10      | NM_002176     | IFNB1    | Interferon, beta 1, fibroblast                                                                            |
| B11      | NM_001556     | IKBKB    | Inhibitor of kappa light polypeptide gene enhancer in B-cells, kinase beta                                |
| B12      | NM_000882     | IL12A    | Interleukin 12A (natural killer cell stimulatory factor 1, cytotoxic lymphocyte maturation factor 1, p35) |
| C01      | NM_002187     | IL12B    | Interleukin 12B (natural killer cell stimulatory factor 2, cytotoxic lymphocyte maturation factor 2, p40) |
| C02      | NM_001562     | IL18     | Interleukin 18 (interferon-gamma-inducing factor)                                                         |
| C03      | NM_000576     | IL1B     | Interleukin 1, beta                                                                                       |
| C04      | NM_000600     | IL6      | Interleukin 6 (interferon, beta 2)                                                                        |
| C05      | NM_000584     | CXCL8    | Interleukin 8                                                                                             |
| C06      | NM_001569     | IRAK1    | Interleukin-1 receptor-associated kinase 1                                                                |
| C07      | NM_007199     | IRAK3    | Interleukin-1 receptor-associated kinase 3                                                                |
| C08      | NM_001098629  | IRF5     | Interferon regulatory factor 5                                                                            |
| C09      | NM_001572     | IRF7     | Interferon regulatory factor 7                                                                            |
| C10      | NM_002228     | JUN      | Jun proto-oncogene                                                                                        |

| Position | RefSeq Number | Symbol  | Description                                                                             |
|----------|---------------|---------|-----------------------------------------------------------------------------------------|
| C11      | NM_004139     | LBP     | Lipopolysaccharide binding protein                                                      |
| C12      | NM_005564     | LCN2    | Lipocalin 2                                                                             |
| D01      | NM_002343     | LTF     | Lactotransferrin                                                                        |
| D02      | NM_015364     | LY96    | Lymphocyte antigen 96                                                                   |
| D03      | NM_000239     | LYZ     | Lysozyme                                                                                |
| D04      | NM_002755     | MAP2K1  | Mitogen-activated protein kinase kinase 1                                               |
| D05      | NM_002756     | MAP2K3  | Mitogen-activated protein kinase kinase 3                                               |
| D06      | NM_003010     | MAP2K4  | Mitogen-activated protein kinase kinase 4                                               |
| D07      | NM_003188     | MAP3K7  | Mitogen-activated protein kinase kinase kinase 7                                        |
| D08      | NM_002745     | MAPK1   | Mitogen-activated protein kinase 1                                                      |
| D09      | NM_001315     | MAPK14  | Mitogen-activated protein kinase 14                                                     |
| D10      | NM_002746     | MAPK3   | Mitogen-activated protein kinase 3                                                      |
| D11      | NM_002750     | MAPK8   | Mitogen-activated protein kinase 8                                                      |
| D12      | NM_000243     | MEFV    | Mediterranean fever                                                                     |
| E01      | NM_000250     | MPO     | Myeloperoxidase                                                                         |
| E02      | NM_002468     | MYD88   | Myeloid differentiation primary response gene (88)                                      |
| E03      | NM_004536     | NAIP    | NLR family, apoptosis inhibitory protein                                                |
| E04      | NM_003998     | NFKB1   | Nuclear factor of kappa light polypeptide gene enhancer in B-cells 1                    |
| E05      | NM_020529     | NFKBIA  | Nuclear factor of kappa light polypeptide gene enhancer in B-cells inhibitor, alpha     |
| E06      | NM_021209     | NLRC4   | NLR family, CARD domain containing 4                                                    |
| E07      | NM_033004     | NLRP1   | NLR family, pyrin domain containing 1                                                   |
| E08      | NM_183395     | NLRP3   | NLR family, pyrin domain containing 3                                                   |
| E09      | NM_006092     | NOD1    | Nucleotide-binding oligomerization domain containing 1                                  |
| E10      | NM_022162     | NOD2    | Nucleotide-binding oligomerization domain containing 2                                  |
| E11      | NM_006218     | PIK3CA  | Phosphoinositide-3-kinase, catalytic, alpha polypeptide                                 |
| E12      | NM_002777     | PRTN3   | Proteinase 3                                                                            |
| F01      | NM_003978     | PSTPIP1 | Proline-serine-threonine phosphatase interacting protein 1                              |
| F02      | NM_013258     | PYCARD  | PYD and CARD domain containing                                                          |
| F03      | NM_006908     | RAC1    | Ras-related C3 botulinum toxin substrate 1 (rho family, small GTP binding protein Rac1) |
| F04      | NM_021975     | RELA    | V-rel reticuloendotheliosis viral oncogene homolog A (avian)                            |
| F05      | NM_003804     | RIPK1   | Receptor (TNFRSF)-interacting serine-threonine kinase 1                                 |
| F06      | NM_003821     | RIPK2   | Receptor-interacting serine-threonine kinase 2                                          |
| F07      | NM_000578     | SLC11A1 | Solute carrier family 11 (proton-coupled divalent metal ion transporters), member 1     |
| F08      | NM_003064     | SLPI    | Secretory leukocyte peptidase inhibitor                                                 |
| F09      | NM_006704     | SUGT1   | SGT1, suppressor of G2 allele of SKP1 ( <i>S. cerevisiae</i> )                          |
| F10      | NM_182919     | TICAM1  | Toll-like receptor adaptor molecule 1                                                   |
| F11      | NM_021649     | TICAM2  | Toll-like receptor adaptor molecule 2                                                   |

| Position | RefSeq Number | Symbol   | Description                                                         |
|----------|---------------|----------|---------------------------------------------------------------------|
| F12      | NM_001039661  | TIRAP    | Toll-interleukin 1 receptor (TIR) domain containing adaptor protein |
| G01      | NM_003263     | TLR1     | Toll-like receptor 1                                                |
| G02      | NM_003264     | TLR2     | Toll-like receptor 2                                                |
| G03      | NM_138554     | TLR4     | Toll-like receptor 4                                                |
| G04      | NM_003268     | TLR5     | Toll-like receptor 5                                                |
| G05      | NM_006068     | TLR6     | Toll-like receptor 6                                                |
| G06      | NM_017442     | TLR9     | Toll-like receptor 9                                                |
| G07      | NM_000594     | TNF      | Tumor necrosis factor                                               |
| G08      | NM_001065     | TNFRSF1A | Tumor necrosis factor receptor superfamily, member 1A               |
| G09      | NM_019009     | TOLLIP   | Toll interacting protein                                            |
| G10      | NM_004620     | TRAF6    | TNF receptor-associated factor 6                                    |
| G11      | NM_001167     | XIAP     | X-linked inhibitor of apoptosis                                     |
| G12      | NM_030776     | ZBP1     | Z-DNA binding protein 1                                             |
| H01      | NM_001101     | ACTB     | Actin, beta                                                         |
| H02      | NM_004048     | B2M      | Beta-2-microglobulin                                                |
| H03      | NM_002046     | GAPDH    | Glyceraldehyde-3-phosphate dehydrogenase                            |
| H04      | NM_000194     | HPRT1    | Hypoxanthine phosphoribosyltransferase 1                            |
| H05      | NM_001002     | RPLP0    | Ribosomal protein, large, P0                                        |
| H06      | SA_00105      | HGDC     | Human Genomic DNA Contamination                                     |
| H07      | SA_00104      | RTC      | Reverse Transcription Control                                       |
| H08      | SA_00104      | RTC      | Reverse Transcription Control                                       |
| H09      | SA_00104      | RTC      | Reverse Transcription Control                                       |
| H10      | SA_00103      | PPC      | Positive PCR Control                                                |
| H11      | SA_00103      | PPC      | Positive PCR Control                                                |
| H12      | SA_00103      | PPC      | Positive PCR Control                                                |

---

# Data analysis setup

## Sample management

| Sample ID | Sample Name  | Group         |
|-----------|--------------|---------------|
| 1         | IC M1 UPEC   | Group 1       |
| 2         | IC M2 UPEC   | Group 1       |
| 3         | IC M4 UPEC   | Group 1       |
| 4         | IC M1 Saline | Control Group |
| 5         | IC M2 Saline | Control Group |
| 6         | IC M3 Saline | Control Group |

## Pre-amplification

A pre-amplification using the appropriate species- and pathway-specific RT<sup>2</sup> PreAMP Primer Mix was performed and the appropriate corrections were made during the data analysis procedure.

## Lower limit of detection

The C<sub>T</sub> cut-off was set to 35



---

# Data quality control (QC)

Quality checks performed and results

| Test Performed                      | Test Result        |
|-------------------------------------|--------------------|
| 1. PCR Array Reproducibility        | All Samples Passed |
| 2. Reverse Transcription Efficiency | All Samples Passed |
| 3. Genomic DNA Contamination        | All Samples Passed |

---

# Normalization analysis

## Manual Selection

| Groups        | Samples      | ACTB  | B2M   | GAPDH | HPRT1 | RPLP0 | Arithmetic Mean | Average Arithmetic Mean |
|---------------|--------------|-------|-------|-------|-------|-------|-----------------|-------------------------|
| Control Group | IC M1 Saline | 15.55 | 18.53 | 15.49 | 20.70 | 15.39 | 17.13           | 16.29                   |
| Control Group | IC M2 Saline | 15.41 | 17.97 | 15.52 | 20.62 | 15.33 | 16.97           |                         |
| Control Group | IC M3 Saline | 13.50 | 15.60 | 12.94 | 18.47 | 13.30 | 14.76           |                         |
| Group 1       | IC M1 UPEC   | 27.32 | 28.96 | 26.41 | 26.78 | 25.74 | 27.04           | 24.44                   |
| Group 1       | IC M2 UPEC   | 25.05 | 28.20 | 24.98 | 27.78 | 24.42 | 26.09           |                         |
| Group 1       | IC M4 UPEC   | 19.90 | 24.01 | 18.49 | 20.95 | 17.61 | 20.19           |                         |

In the Manual Selection method, the arithmetic or geometric means of the data from the assays for the housekeeping / reference genes listed in the table were used to normalize the raw data.

# Result

## Fold regulation and p-value

| Test Group | Control Group | Fold Regulation Threshold | p-Value Threshold |
|------------|---------------|---------------------------|-------------------|
| Group 1    | Control Group | 2                         | 0.05              |

| Position | Gene Symbol | Fold Regulation | p-Value  | Comments |
|----------|-------------|-----------------|----------|----------|
| B08      | HSP90AA1    | 13.51           | 0.005036 |          |
| B12      | IL12A       | 13.68           | 0.005460 |          |
| C01      | IL12B       | 50.35           | 0.047669 |          |
| C03      | IL1B        | 5.70            | 0.007394 |          |
| D02      | LY96        | 4.28            | 0.020612 |          |
| D07      | MAP3K7      | 9.50            | 0.000014 |          |
| D08      | MAPK1       | 6.21            | 0.000031 |          |
| D10      | MAPK3       | 3.75            | 0.020362 |          |
| D11      | MAPK8       | 3.11            | 0.000313 |          |
| E11      | PIK3CA      | 2.57            | 0.029412 |          |
| F02      | PYCARD      | 26.57           | 0.025879 |          |
| F09      | SUGT1       | 11.52           | 0.000558 |          |
| G04      | TLR5        | 22.82           | 0.039230 | A        |
| G09      | TOLLIP      | 41.53           | 0.041028 |          |
| G11      | XIAP        | 7.45            | 0.037814 |          |
| A09      | CASP8       | -5.71           | 0.011765 | A        |
| E02      | MYD88       | -5.38           | 0.011814 | A        |
| F05      | RIPK1       | -2.47           | 0.010605 | A        |
| G08      | TNFRSF1A    | -2.58           | 0.009846 |          |
| G10      | TRAF6       | -5.54           | 0.011066 | A        |
| H01      | ACTB        | -2.17           | 0.026279 |          |
| H02      | B2M         | -2.90           | 0.022013 |          |

Fold-Change ( $2^{(-\Delta\Delta C_t)}$ ) is the normalized gene expression ( $2^{(-\Delta C_t)}$ ) in the Test Sample divided the normalized gene expression ( $2^{(-\Delta C_t)}$ ) in the Control Sample. Fold-Regulation represents fold-change results in a biologically meaningful way. Fold-change values greater than one indicates a positive- or an up-regulation, and the fold-regulation is equal to the fold-change. Fold-change values less than one indicate a negative or down-regulation, and the fold-regulation is the negative inverse of the fold-change.

The p values are calculated based on a Student's t-test of the replicate  $2^{(-\Delta C_t)}$  values for each gene in the control group and treatment groups, and p values less than 0.05 are indicated in red. The p-value calculation used is based on parametric, unpaired, two-sample equal variance, two-tailed distribution – a method widely accepted in scientific literature.

## Scatter Plot

| Test Group | Control Group | Fold Regulation Threshold |
|------------|---------------|---------------------------|
| Group 1    | Control Group | 2                         |

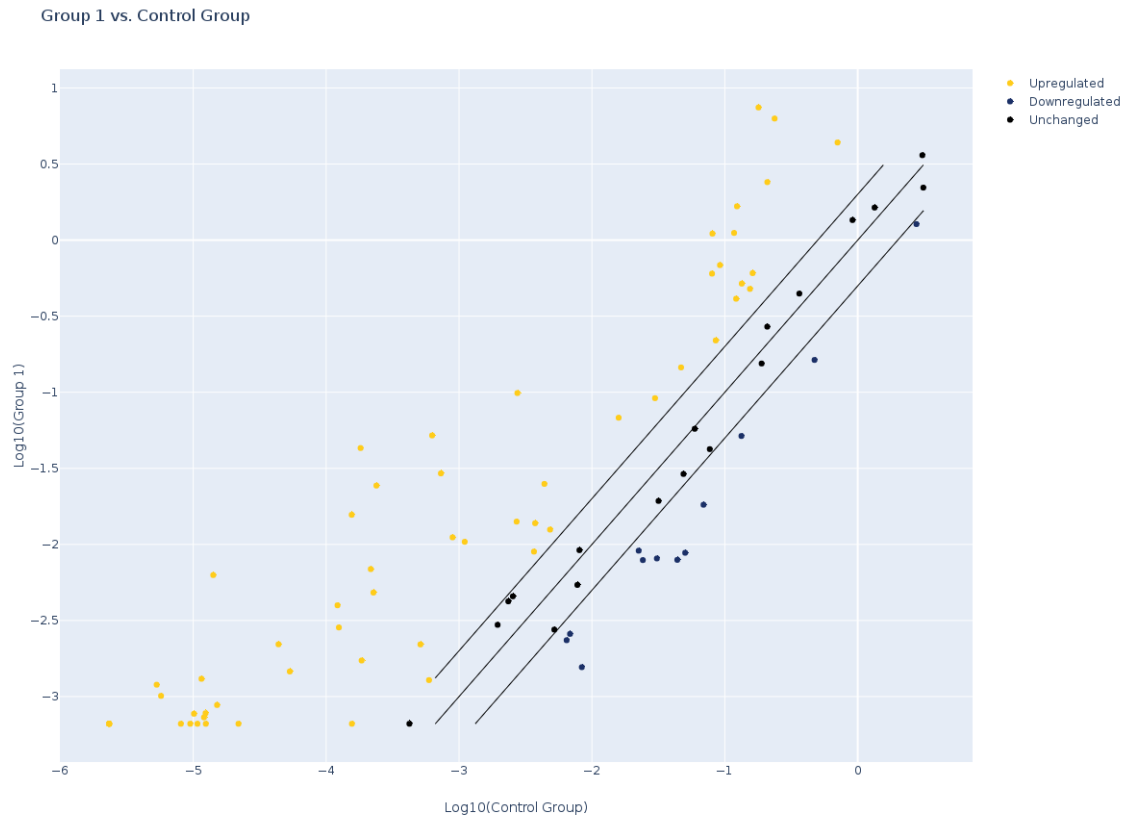

The Scatter Plot compares the normalized expression of every gene on the PCR Array between the two selected groups by plotting them against one another to quickly visualize large gene expression changes. The center diagonal line indicates unchanged gene expression, while the outer diagonal lines indicate the selected fold regulation threshold. Genes with data points beyond the outer lines in the upper left and lower right corners are up-regulated or down-regulated, respectively, by more than the fold regulation threshold in the y-axis Group relative to the x-axis Group.

## Genes Over-Expressed in Group 1 vs. Control Group

| Position | Gene Symbol | Fold Regulation | Comments | RT <sup>2</sup> qPCR Assay Catalog # |
|----------|-------------|-----------------|----------|--------------------------------------|
| A02      | APCS        | 82.10           | B        | PPH07107A                            |
| A04      | BPI         | 284.40          | C        | PPH16561B                            |
| A05      | CAMP        | 76.13           | B        | PPH09430A                            |
| A07      | CARD9       | 2.58            | A        | PPH06127F                            |
| A08      | CASP1       | 100.62          | A        | PPH00105C                            |
| A10      | CCL3        | 101.94          |          | PPH00566F                            |
| A11      | CCL5        | 40.11           |          | PPH00703B                            |
| A12      | CD14        | 5.21            | A        | PPH05723A                            |
| B03      | CTSG        | 60.62           | B        | PPH01358A                            |
| B04      | CXCL1       | 225.51          | B        | PPH00696C                            |
| B05      | CXCL2       | 284.40          | C        | PPH00552F                            |
| B06      | DMBT1       | 444.85          | B        | PPH15755A                            |
| B07      | FADD        | 284.40          | C        | PPH00367A                            |
| B08      | HSP90AA1    | 13.51           |          | PPH63391B                            |
| B10      | IFNB1       | 284.40          | C        | PPH00384F                            |
| B11      | IKKBK       | 113.41          | B        | PPH00780C                            |
| B12      | IL12A       | 13.68           |          | PPH00544B                            |
| C01      | IL12B       | 50.35           |          | PPH00545A                            |
| C02      | IL18        | 53.29           | B        | PPH00580C                            |
| C03      | IL1B        | 5.70            |          | PPH00171C                            |
| C05      | CXCL8       | 69.80           | B        | PPH00568A                            |
| C06      | IRAK1       | 3.86            |          | PPH00835A                            |
| C07      | IRAK3       | 4.24            | A        | PPH06041A                            |
| C08      | IRF5        | 2.45            | A        | PPH02870A                            |
| C11      | LBP         | 12.44           | A        | PPH01424F                            |
| C12      | LCN2        | 3.69            | A        | PPH00446E                            |
| D01      | LTF         | 61.65           | B        | PPH05751A                            |
| D02      | LY96        | 4.28            |          | PPH06052A                            |
| D06      | MAP2K4      | 3.39            |          | PPH00195C                            |
| D07      | MAP3K7      | 9.50            |          | PPH00749C                            |
| D08      | MAPK1       | 6.21            |          | PPH00715B                            |
| D09      | MAPK14      | 3.09            |          | PPH00750B                            |
| D10      | MAPK3       | 3.75            |          | PPH00721F                            |
| D11      | MAPK8       | 3.11            |          | PPH00720B                            |
| D12      | MEFV        | 176.56          | B        | PPH13601A                            |
| E01      | MPO         | 284.40          | C        | PPH06082F                            |

| Position | Gene Symbol | Fold Regulation | Comments | RT <sup>2</sup> qPCR Assay Catalog # |
|----------|-------------|-----------------|----------|--------------------------------------|
| E03      | NAIP        | 62.78           | B        | PPH00909E                            |
| E06      | NLRC4       | 58.26           | B        | PPH06124A                            |
| E07      | NLRP1       | 284.40          | C        | PPH06155E                            |
| E08      | NLRP3       | 2.16            | A        | PPH13170A                            |
| E10      | NOD2        | 82.95           |          | PPH06126F                            |
| E11      | PIK3CA      | 2.57            |          | PPH01355A                            |
| E12      | PRTN3       | 236.88          |          | PPH07029A                            |
| F01      | PSTPIP1     | 31.76           | A        | PPH11981A                            |
| F02      | PYCARD      | 26.57           |          | PPH00907A                            |
| F08      | SLPI        | 32.68           | A        | PPH02863A                            |
| F09      | SUGT1       | 11.52           |          | PPH05871A                            |
| F11      | TICAM2      | 30.27           | B        | PPH06042A                            |
| F12      | TIRAP       | 3.06            |          | PPH06246B                            |
| G02      | TLR2        | 9.43            | A        | PPH01808A                            |
| G03      | TLR4        | 21.26           | A        | PPH01795F                            |
| G04      | TLR5        | 22.82           | A        | PPH01793F                            |
| G05      | TLR6        | 4.30            | A        | PPH01798E                            |
| G06      | TLR9        | 9.34            | A        | PPH01809A                            |
| G07      | TNF         | 27.44           | B        | PPH00341F                            |
| G09      | TOLLIP      | 41.53           |          | PPH05844C                            |
| G11      | XIAP        | 7.45            |          | PPH00323A                            |
| G12      | ZBP1        | 35.97           |          | PPH16531C                            |
| H04      | HPRT1       | 7.52            |          | PPH01018C                            |

---

## Genes Under-Expressed in Group 1 vs. Control Group

| Position | Gene Symbol | Fold Regulation | Comments | RT <sup>2</sup> qPCR Assay Catalog # |
|----------|-------------|-----------------|----------|--------------------------------------|
| A09      | CASP8       | -5.71           | A        | <a href="#">PPH00359F</a>            |
| B01      | CHUK        | -2.75           | A        | <a href="#">PPH00649C</a>            |
| B02      | CRP         | -3.79           | A        | <a href="#">PPH02632A</a>            |
| E02      | MYD88       | -5.38           | A        | <a href="#">PPH00911B</a>            |
| E05      | NFKBIA      | -3.81           | A        | <a href="#">PPH00170F</a>            |
| F05      | RIPK1       | -2.47           | A        | <a href="#">PPH00335C</a>            |
| F06      | RIPK2       | -2.65           | A        | <a href="#">PPH00881C</a>            |
| F10      | TICAM1      | -3.06           | A        | <a href="#">PPH06044A</a>            |
| G08      | TNFRSF1A    | -2.58           |          | <a href="#">PPH00346C</a>            |
| G10      | TRAF6       | -5.54           | A        | <a href="#">PPH00329B</a>            |
| H01      | ACTB        | -2.17           |          | <a href="#">PPH00073G</a>            |
| H02      | B2M         | -2.90           |          | <a href="#">PPH01094E</a>            |

## Volcano Plot

| Test Group | Control Group | Fold Regulation Threshold | p-Value Threshold |
|------------|---------------|---------------------------|-------------------|
| Group 1    | Control Group | 2                         | 0.05              |

Group 1 vs. Control Group

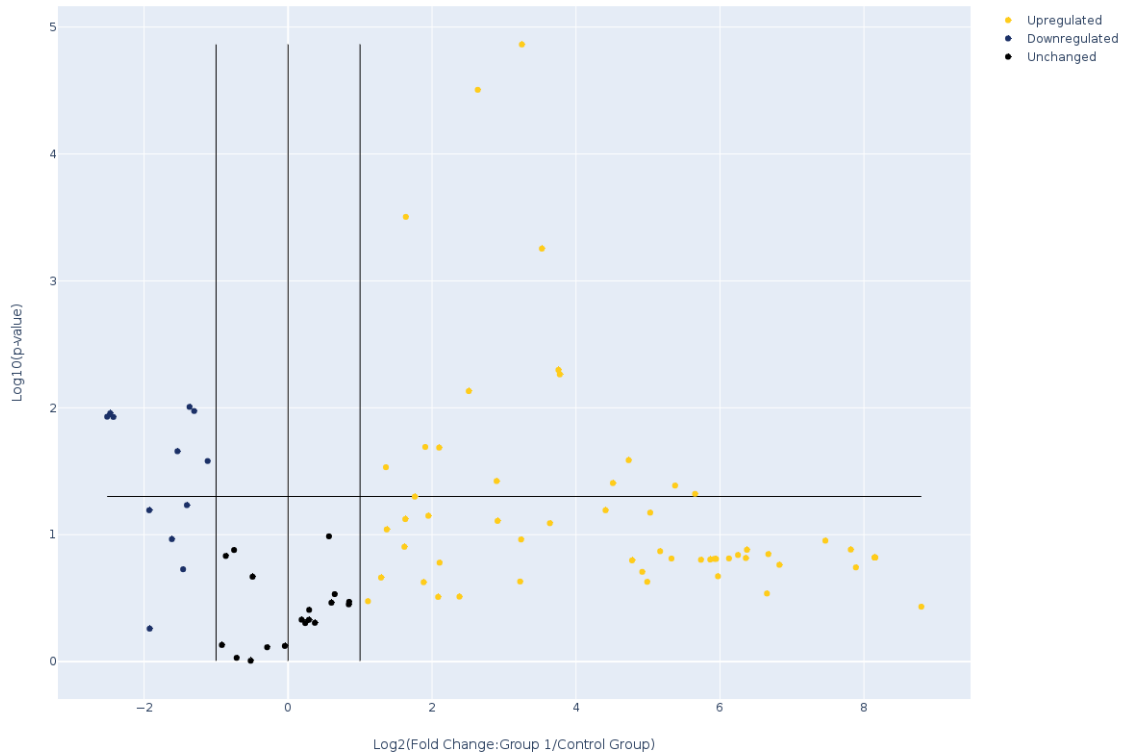

The Volcano Plot identifies significant gene expression changes by plotting the log<sub>2</sub> of the fold changes in gene expression on the x-axis versus their statistical significance on the y-axis. The center vertical line indicates unchanged gene expression, while the two outer vertical lines indicate the selected fold regulation threshold. The horizontal line indicates the selected p-value threshold. Genes with data points in the far upper left (down-regulated) and far upper right (up-regulated) sections meet the selected fold regulation and p-value thresholds. By combining the fold change results with the p-value statistical test results, genes with both large and small expression changes that are statistically significant are easily visualized.



## Genes Over-Expressed in Group 1 vs. Control Group

| Position | Gene Symbol | Fold Regulation | p-Value  | Comments | RT <sup>2</sup> qPCR Assay Catalog # |
|----------|-------------|-----------------|----------|----------|--------------------------------------|
| A02      | APCS        | 82.10           | 0.152817 | B        | PPH07107A                            |
| A04      | BPI         | 284.40          | 0.151122 | C        | PPH16561B                            |
| A05      | CAMP        | 76.13           | 0.144655 | B        | PPH09430A                            |
| A07      | CARD9       | 2.58            | 0.091009 | A        | PPH06127F                            |
| A08      | CASP1       | 100.62          | 0.290793 | A        | PPH00105C                            |
| A10      | CCL3        | 101.94          | 0.142366 |          | PPH00566F                            |
| A11      | CCL5        | 40.11           | 0.154224 |          | PPH00703B                            |
| A12      | CD14        | 5.21            | 0.307835 | A        | PPH05723A                            |
| B03      | CTSG        | 60.62           | 0.155123 | B        | PPH01358A                            |
| B04      | CXCL1       | 225.51          | 0.131080 | B        | PPH00696C                            |
| B05      | CXCL2       | 284.40          | 0.151122 | C        | PPH00552F                            |
| B06      | DMBT1       | 444.85          | 0.369415 | B        | PPH15755A                            |
| B07      | FADD        | 284.40          | 0.151122 | C        | PPH00367A                            |
| B08      | HSP90AA1    | 13.51           | 0.005036 |          | PPH63391B                            |
| B10      | IFNB1       | 284.40          | 0.151122 | C        | PPH00384F                            |
| B11      | IKBKB       | 113.41          | 0.172864 | B        | PPH00780C                            |
| B12      | IL12A       | 13.68           | 0.005460 |          | PPH00544B                            |
| C01      | IL12B       | 50.35           | 0.047669 |          | PPH00545A                            |
| C02      | IL18        | 53.29           | 0.157678 | B        | PPH00580C                            |
| C03      | IL1B        | 5.70            | 0.007394 |          | PPH00171C                            |
| C05      | CXCL8       | 69.80           | 0.153932 | B        | PPH00568A                            |
| C06      | IRAK1       | 3.86            | 0.071011 |          | PPH00835A                            |
| C07      | IRAK3       | 4.24            | 0.309664 | A        | PPH06041A                            |
| C08      | IRF5        | 2.45            | 0.217979 | A        | PPH02870A                            |
| C11      | LBP         | 12.44           | 0.081246 | A        | PPH01424F                            |
| C12      | LCN2        | 3.69            | 0.237004 | A        | PPH00446E                            |
| D01      | LTF         | 61.65           | 0.155264 | B        | PPH05751A                            |
| D02      | LY96        | 4.28            | 0.020612 |          | PPH06052A                            |
| D06      | MAP2K4      | 3.39            | 0.050188 |          | PPH00195C                            |
| D07      | MAP3K7      | 9.50            | 0.000014 |          | PPH00749C                            |
| D08      | MAPK1       | 6.21            | 0.000031 |          | PPH00715B                            |
| D09      | MAPK14      | 3.09            | 0.075421 |          | PPH00750B                            |
| D10      | MAPK3       | 3.75            | 0.020362 |          | PPH00721F                            |
| D11      | MAPK8       | 3.11            | 0.000313 |          | PPH00720B                            |
| D12      | MEFV        | 176.56          | 0.111528 | B        | PPH13601A                            |
| E01      | MPO         | 284.40          | 0.151122 | C        | PPH06082F                            |

| Position | Gene Symbol | Fold Regulation | p-Value  | Comments | RT <sup>2</sup> qPCR Assay Catalog # |
|----------|-------------|-----------------|----------|----------|--------------------------------------|
| E03      | NAIP        | 62.78           | 0.212859 | B        | PPH00909E                            |
| E06      | NLRC4       | 58.26           | 0.157054 | B        | PPH06124A                            |
| E07      | NLRP1       | 284.40          | 0.151122 | C        | PPH06155E                            |
| E08      | NLRP3       | 2.16            | 0.334714 | A        | PPH13170A                            |
| E10      | NOD2        | 82.95           | 0.131628 |          | PPH06126F                            |
| E11      | PIK3CA      | 2.57            | 0.029412 |          | PPH01355A                            |
| E12      | PRTN3       | 236.88          | 0.181103 |          | PPH07029A                            |
| F01      | PSTPIP1     | 31.76           | 0.235284 | A        | PPH11981A                            |
| F02      | PYCARD      | 26.57           | 0.025879 |          | PPH00907A                            |
| F08      | SLPI        | 32.68           | 0.067081 | A        | PPH02863A                            |
| F09      | SUGT1       | 11.52           | 0.000558 |          | PPH05871A                            |
| F11      | TICAM2      | 30.27           | 0.196212 | B        | PPH06042A                            |
| F12      | TIRAP       | 3.06            | 0.124674 |          | PPH06246B                            |
| G02      | TLR2        | 9.43            | 0.109141 | A        | PPH01808A                            |
| G03      | TLR4        | 21.26           | 0.064220 | A        | PPH01795F                            |
| G04      | TLR5        | 22.82           | 0.039230 | A        | PPH01793F                            |
| G05      | TLR6        | 4.30            | 0.166207 | A        | PPH01798E                            |
| G06      | TLR9        | 9.34            | 0.233951 | A        | PPH01809A                            |
| G07      | TNF         | 27.44           | 0.159485 | B        | PPH00341F                            |
| G09      | TOLLIP      | 41.53           | 0.041028 |          | PPH05844C                            |
| G11      | XIAP        | 7.45            | 0.037814 |          | PPH00323A                            |
| G12      | ZBP1        | 35.97           | 0.135086 |          | PPH16531C                            |
| H04      | HPRT1       | 7.52            | 0.077954 |          | PPH01018C                            |

---

## Genes Under-Expressed in Group 1 vs. Control Group

| Position | Gene Symbol | Fold Regulation | p-Value  | Comments | RT <sup>2</sup> qPCR Assay Catalog # |
|----------|-------------|-----------------|----------|----------|--------------------------------------|
| A09      | CASP8       | -5.71           | 0.011765 | A        | PPH00359F                            |
| B01      | CHUK        | -2.75           | 0.187327 | A        | PPH00649C                            |
| B02      | CRP         | -3.79           | 0.550285 | A        | PPH02632A                            |
| E02      | MYD88       | -5.38           | 0.011814 | A        | PPH00911B                            |
| E05      | NFKBIA      | -3.81           | 0.064225 | A        | PPH00170F                            |
| F05      | RIPK1       | -2.47           | 0.010605 | A        | PPH00335C                            |
| F06      | RIPK2       | -2.65           | 0.058542 | A        | PPH00881C                            |
| F10      | TICAM1      | -3.06           | 0.108474 | A        | PPH06044A                            |
| G08      | TNFRSF1A    | -2.58           | 0.009846 |          | PPH00346C                            |
| G10      | TRAF6       | -5.54           | 0.011066 | A        | PPH00329B                            |
| H01      | ACTB        | -2.17           | 0.026279 |          | PPH00073G                            |
| H02      | B2M         | -2.90           | 0.022013 |          | PPH01094E                            |

# Clustergram

| Sample | Dimension | Join Type | Color Coded |
|--------|-----------|-----------|-------------|
| Array  | 2-D       | Average   | Genes       |

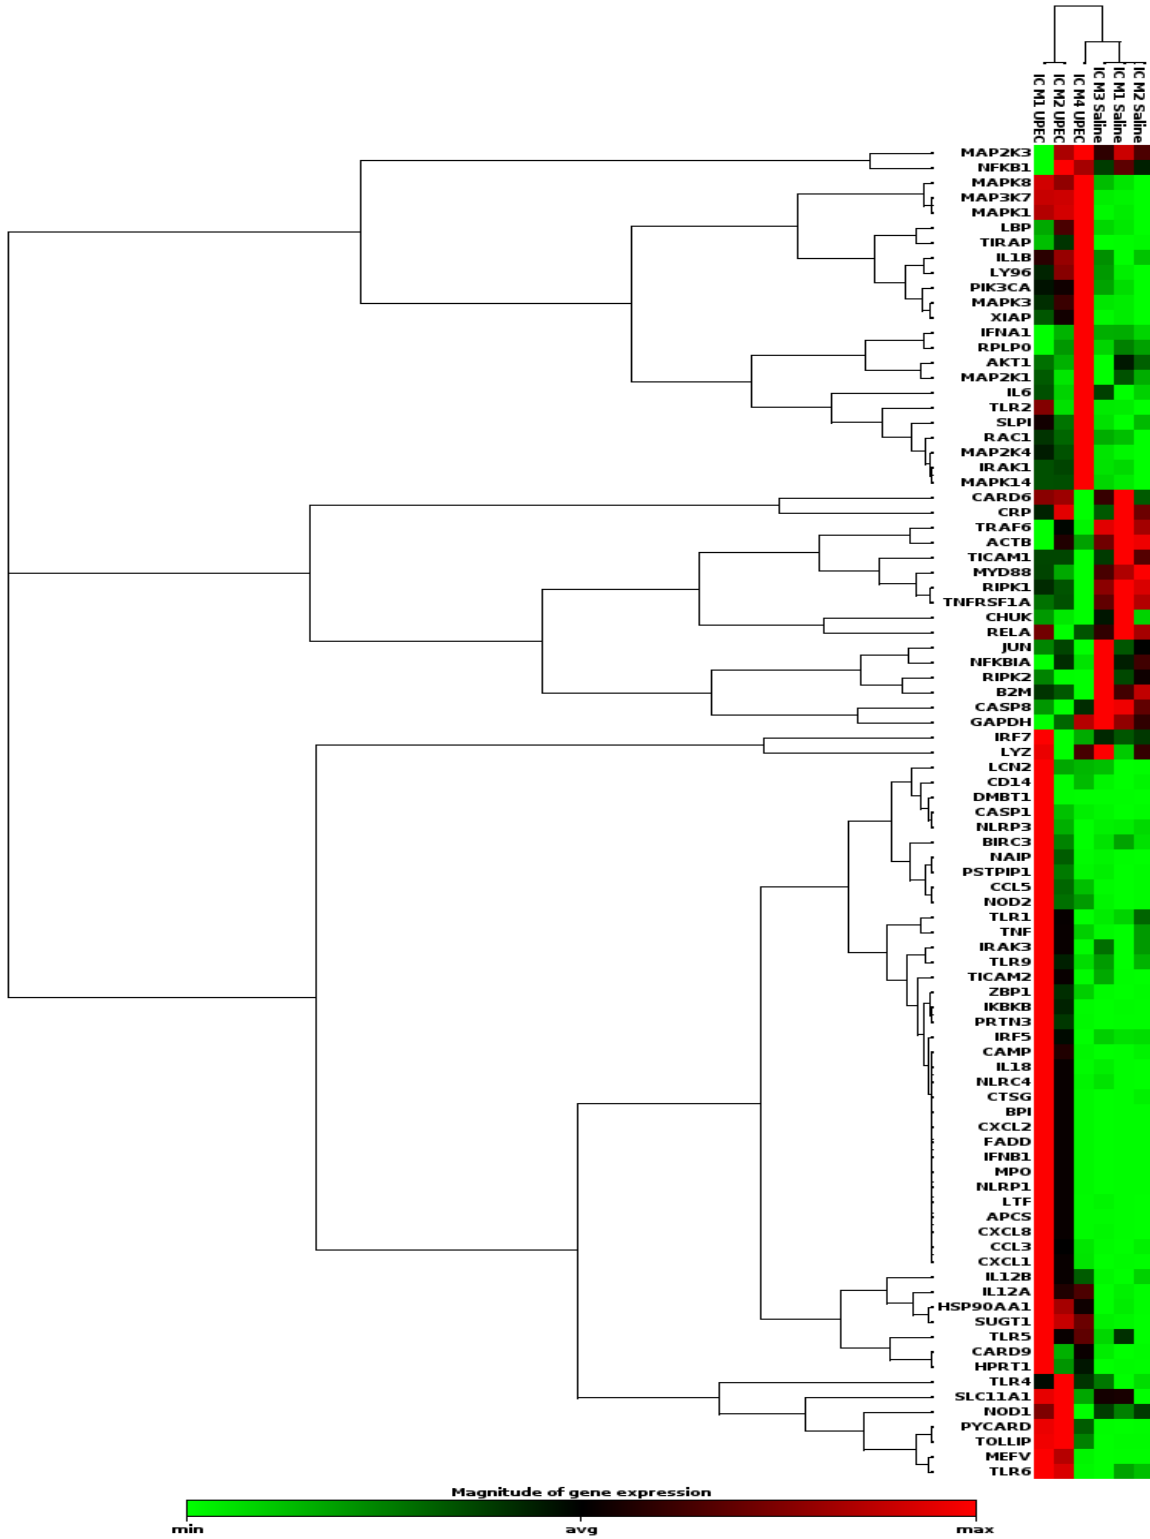

# Heat Map

| Test Group | Control Group |
|------------|---------------|
| Group 1    | Control Group |

Visualization of log2(Fold Change)

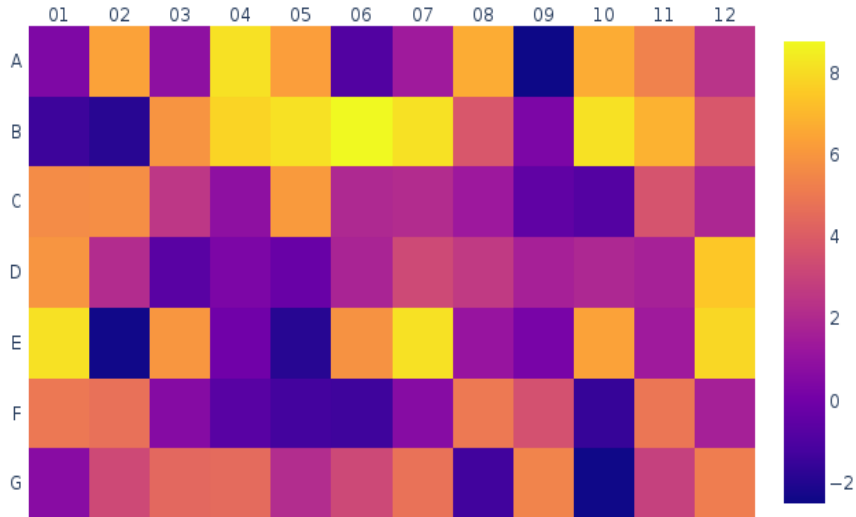

| Layout | 01                  | 02                | 03               | 04                 | 05                 | 06                 | 07                 | 08                 | 09                | 10                 | 11                 | 12                |
|--------|---------------------|-------------------|------------------|--------------------|--------------------|--------------------|--------------------|--------------------|-------------------|--------------------|--------------------|-------------------|
| A      | AKT1 / 1.29         | APCS / 82.1 / B   | BIRC3 / 1.79 / A | BPI / 284.4 / C    | CAMP / 76.13 / B   | CARD6 / -1.89 / A  | CARD9 / 2.58 / A   | CASP1 / 100.62 / A | CASP8 / -5.71 / A | CCL3 / 101.94      | CCL5 / 40.11       | CD14 / 5.21 / A   |
| B      | CHUK / -2.75 / A    | CRP / -3.79 / A   | CTSG / 60.62 / B | CXCL1 / 225.51 / B | CXCL2 / 284.4 / C  | DMBT1 / 444.85 / B | FADD / 284.4 / C   | HSP90AA1 / 13.51   | IFNA1 / 1.22      | IFNB1 / 284.4 / C  | IKKB / 113.41 / B  | IL12A / 13.68     |
| C      | IL12B / 50.35       | IL18 / 53.29 / B  | IL1B / 5.7       | IL6 / 1.8 / A      | CXCL8 / 69.8 / B   | IRAK1 / 3.86       | IRAK3 / 4.24 / A   | IRF5 / 2.45 / A    | IRF7 / -1.43 / A  | JUN / -1.82        | LBP / 12.44 / A    | LCN2 / 3.69 / A   |
| D      | LTF / 61.65 / B     | LY96 / 4.28       | LYZ / -1.64 / A  | MAP2K1 / 1.22      | MAP2K3 / -1.22     | MAP2K4 / 3.39      | MAP3K7 / 9.5       | MAPK1 / 6.21       | MAPK14 / 3.09     | MAPK3 / 3.75       | MAPK8 / 3.11       | MEFV / 176.56 / B |
| E      | MPO / 284.4 / C     | MYD88 / -5.38 / A | NAIP / 62.78 / B | NFKB1 / -1.03      | NFKBIA / -3.81 / A | NLRC4 / 58.26 / B  | NLRP1 / 284.4 / C  | NLRP3 / 2.16 / A   | NOD1 / 1.14 / A   | NOD2 / 82.95       | PIK3CA / 2.57      | PRTN3 / 236.88    |
| F      | PSTPIP1 / 31.76 / A | PYCARD / 26.57    | RAC1 / 1.48      | RELA / -1.68       | RIPK1 / -2.47 / A  | RIPK2 / -2.65 / A  | SLC11A1 / 1.52 / A | SLPI / 32.68 / A   | SUGT1 / 11.52     | TICAM1 / -3.06 / A | TICAM2 / 30.27 / B | TIRAP / 3.06      |
| G      | TLR1 / 1.57 / A     | TLR2 / 9.43 / A   | TLR4 / 21.26 / A | TLR5 / 22.82 / A   | TLR6 / 4.3 / A     | TLR9 / 9.34 / A    | TNF / 27.44 / B    | TNFRSF1A / -2.58   | TOLLIP / 41.53    | TRAF6 / -5.54 / A  | XIAP / 7.45        | ZBP1 / 35.97      |
