# Supplementary material for: MAP3K7 is an innate immune regulatory gene with increased expression in human and murine kidney intercalated cells following uropathogenic Escherichia coli exposure
Source: PubMed Central journal article supplement — J Cell Biochem. 2022 Aug 12;123(11):1817–26. doi: 10.1002/jcb.30318 (PMC9671826; doi:10.1002/jcb.30318), 2022-08-12
Supplement: NIHMS1827887-supplement-supinfo5.pdf [file NIHMS1827887-supplement-supinfo5.pdf]

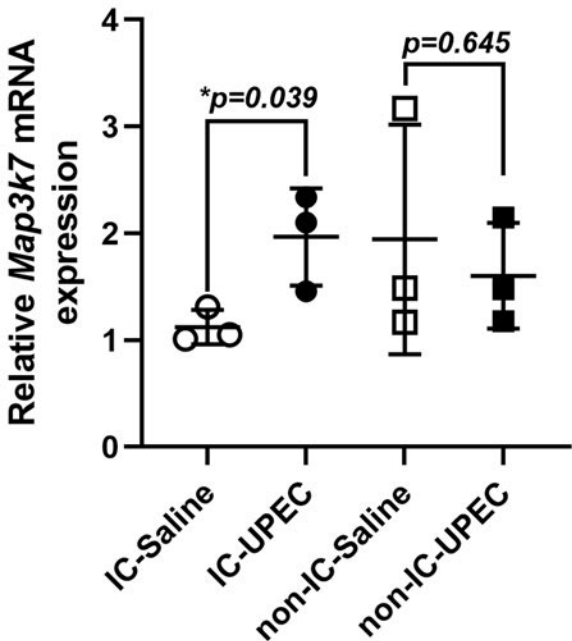

Supplementary material S3. Murine c-Kit<sup>+</sup> IC cells upregulate *Map3k7* mRNA upon UPEC exposure *in vivo*. To confirm the RT<sup>2</sup> array finding of increased *Map3k7* mRNA, c-Kit<sup>+</sup> ICs and non-intercalated (non-IC) epithelial cells were enriched from C57BL/6 mice by magnetic activated cell sorting (MACS) after one hour of transurethral saline and UPEC exposure. *Map3k7* mRNA was detected by RT-PCR. n=3 mice/group. Data is presented as individual mice and error bar represent mean ± SD.
