# Supplementary material for: MAP3K7 is an innate immune regulatory gene with increased expression in human and murine kidney intercalated cells following uropathogenic Escherichia coli exposure
Source: PubMed Central journal article supplement — J Cell Biochem. 2022 Aug 12;123(11):1817–26. doi: 10.1002/jcb.30318 (PMC9671826; doi:10.1002/jcb.30318), 2022-08-12
Supplement: NIHMS1827887-supplement-supinfo6.pdf [file NIHMS1827887-supplement-supinfo6.pdf]

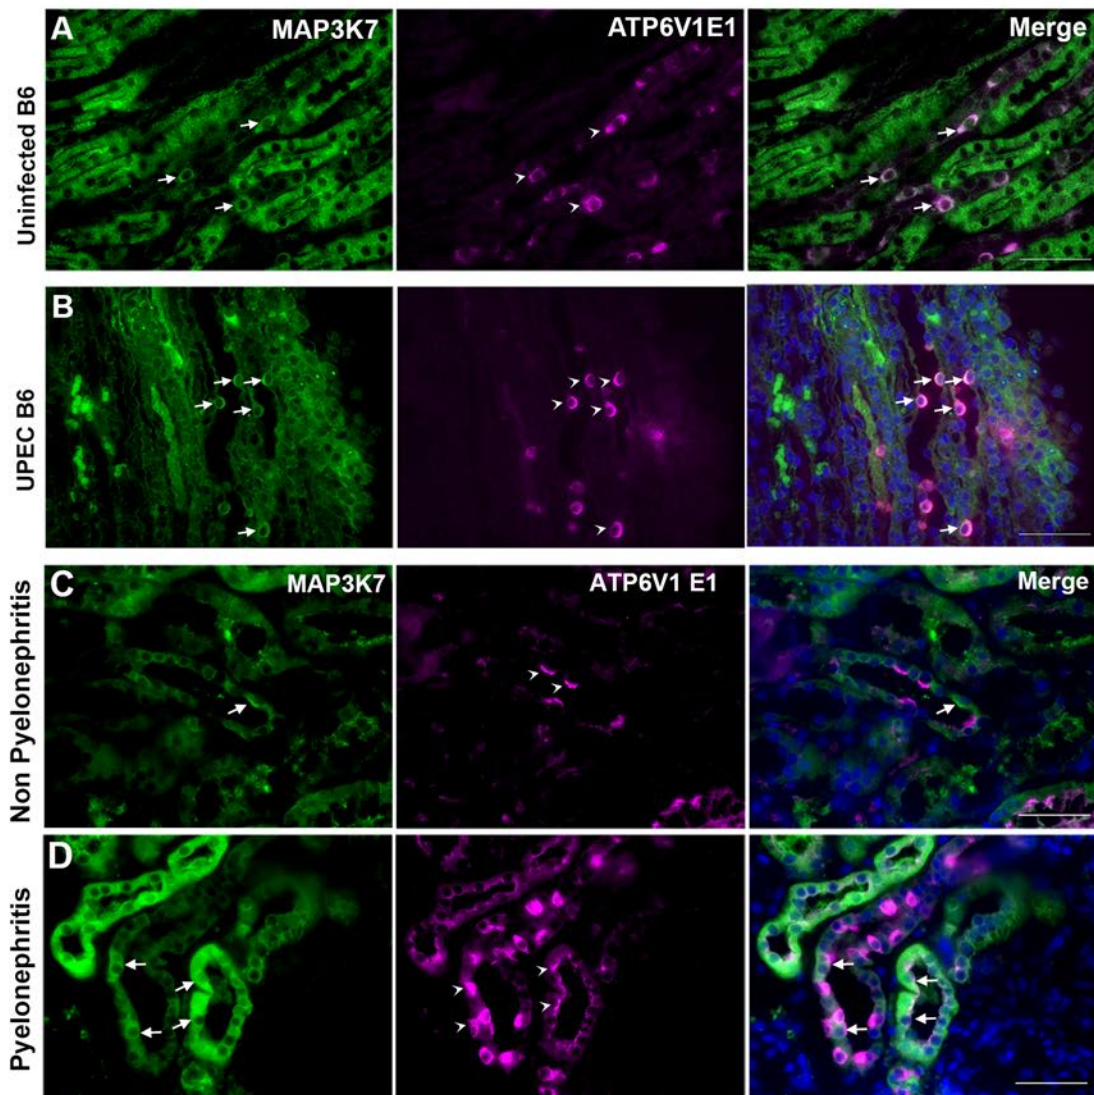

**Supplementary material S4.** MAP3K7 immunofluorescence. MAP3K7 immunofluorescence staining from uninfected (A) and CFT073 infected (B) C57BL/6 (B6) mice kidney section. Few ICs (magenta) in non-infected mice were spontaneously positive for MAP3K7 (green) but MAP3K7 was more pronounced in UPEC infected mouse. Data is a representative of 2 different mice tissue staining. Human kidney sections from non-pyelonephritis (C) and pyelonephritis (D) patient were stained with IC marker, V-ATPase E1(magenta, white arrowheads) and MAP3K7 (green, white arrows). Data is representative staining of 2 sections/slide. Strong staining in pyelonephritis kidney section is likely thick ascending loop (TAL). Red fluorescence is cyan pseudocolored magenta. Scale bar 50 $\mu$ m, magnification 60x.
